# Supplementary material for: Cost-Effectiveness of Liquid Biopsy for Colorectal Cancer Screening in Patients Who Are Unscreened
Source: PubMed Central journal article supplement (PMC10654798; doi:10.1001/jamanetworkopen.2023.43392), 2023-11-16
Supplement: jamanetwopen-e2343392-s002.pdf [file jamanetwopen-e2343392-s002.pdf]

## Data Sharing Statement

### Data

**Data available:** Yes

**Data types:** Data (not involving human participants)

**How to access data:** [za2278@cumc.columbia.edu](mailto:za2278@cumc.columbia.edu)

**When available:** With publication

### Supporting Documents

**Document types:** None

### Additional Information

**Who can access the data:** Researchers who would like data

**Types of analyses:** any purpose

**Mechanisms of data availability:** with investigator support
